# Supplementary material
Source: Springer Nature journal article supplement (https://www.springermedizin.de/resource/supplementary/12958_2003_9_MOESM2_ESM.pdf/9566378)

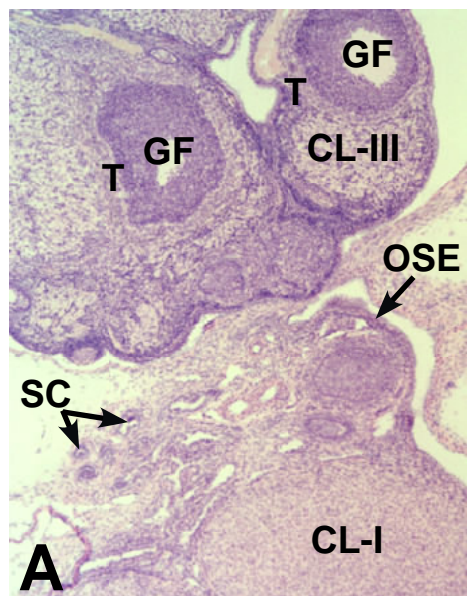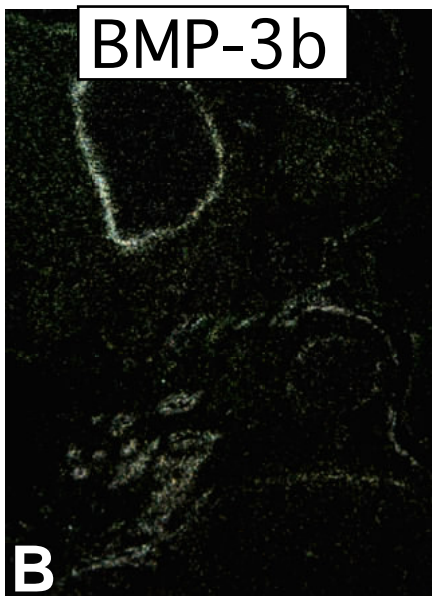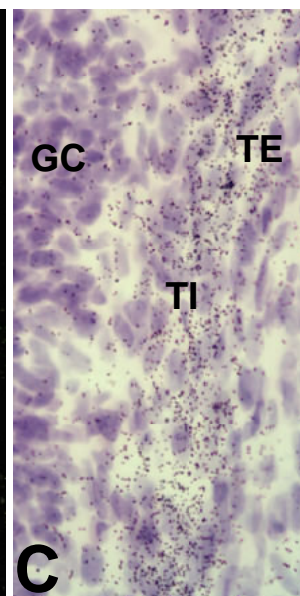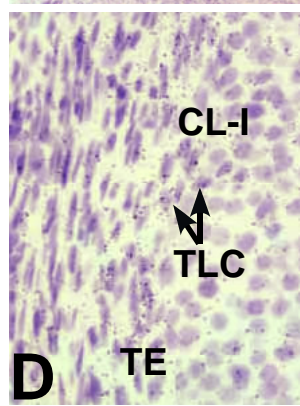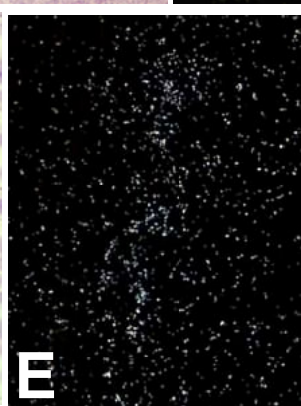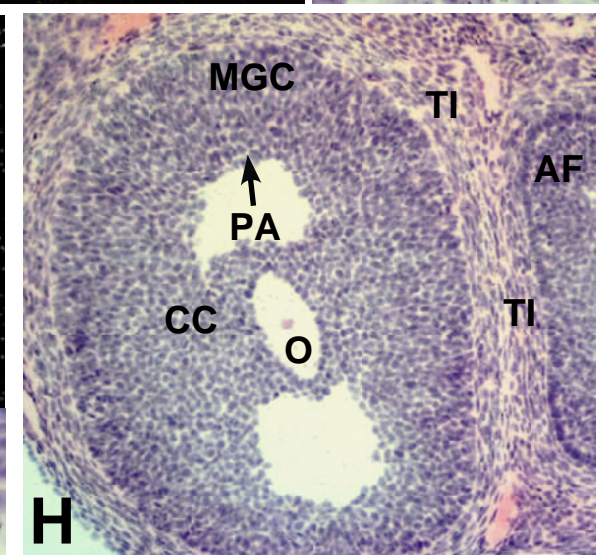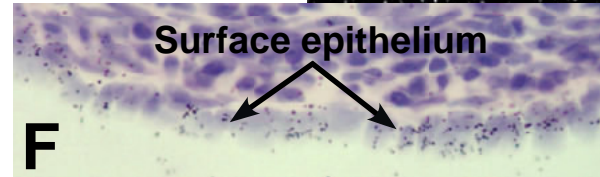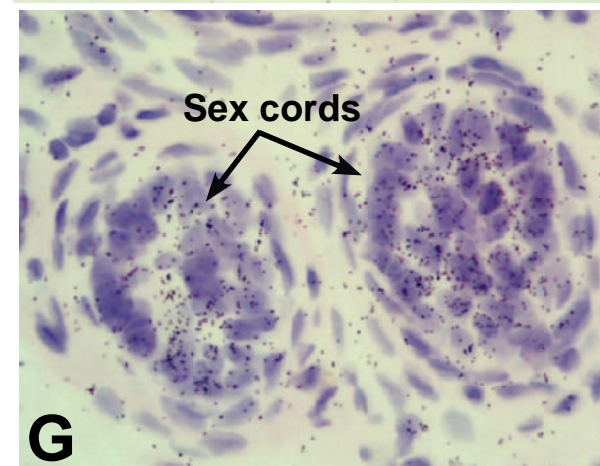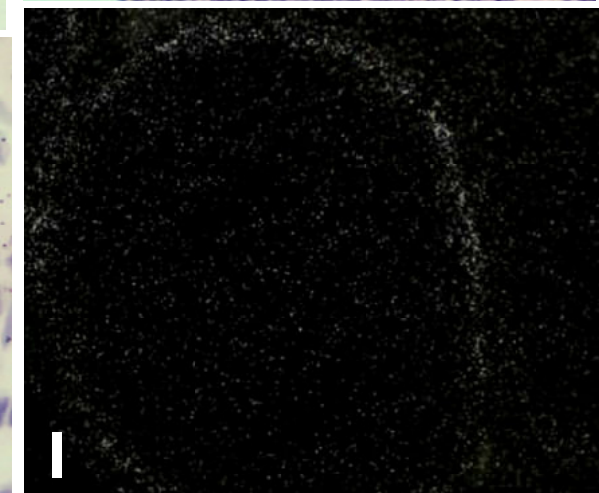

Supplement: MOESM2 [file 9566378]
